# Supplementary material for: Rare earth nanoparticles for sprayed and intravenous NIR II imaging and photodynamic therapy of tongue cancer
Source: Royal Society of Chemistry journal article supplement (doi:10.1039/d2na00197g), 2022-01-01
Supplement: d2na00197g1.pdf [file d2na00197g1.pdf]

## Supplementary Information

---

### **Rare earth nanoparticles for spayed and intravenous NIR II imaging with photodynamic therapy for tongue cancer**

Lingling Cai<sup>a</sup>, Zhan Wang<sup>b</sup>, Bi Lin<sup>b</sup>, Kaikai Liu<sup>b</sup>, Yanxing Wang<sup>b</sup>, Ying Yuan<sup>a,\*</sup>, Xiaofeng Tao<sup>a,\*</sup>, Ruichan Lv<sup>b,\*</sup>

- a. Department of Radiology, School of Medicine, Shanghai Ninth People's Hospital, Shanghai Jiao Tong University, Shanghai 200011, China. Email: [yuany83@163.com](mailto:yuany83@163.com); [cjr.taoxiaofeng@vip.163.com](mailto:cjr.taoxiaofeng@vip.163.com).
- b. Engineering Research Center of Molecular and Neuro Imaging, Ministry of Education, School of Life Science and Technology, Xidian University, Xi'an, Shanxi 710071, China. Email: [rclv@xidian.edu.cn](mailto:rclv@xidian.edu.cn).

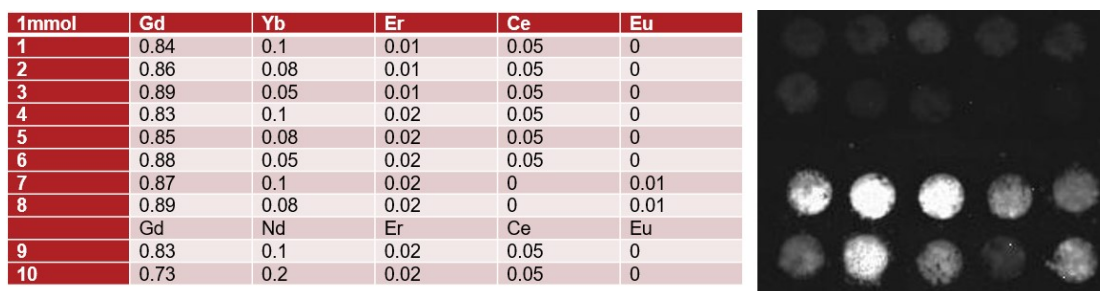

**Fig. S1.** The components of RENP phosphors in the supplementary first generation and the corresponding NIR II imaging of RENP (808 nm, LP1300).

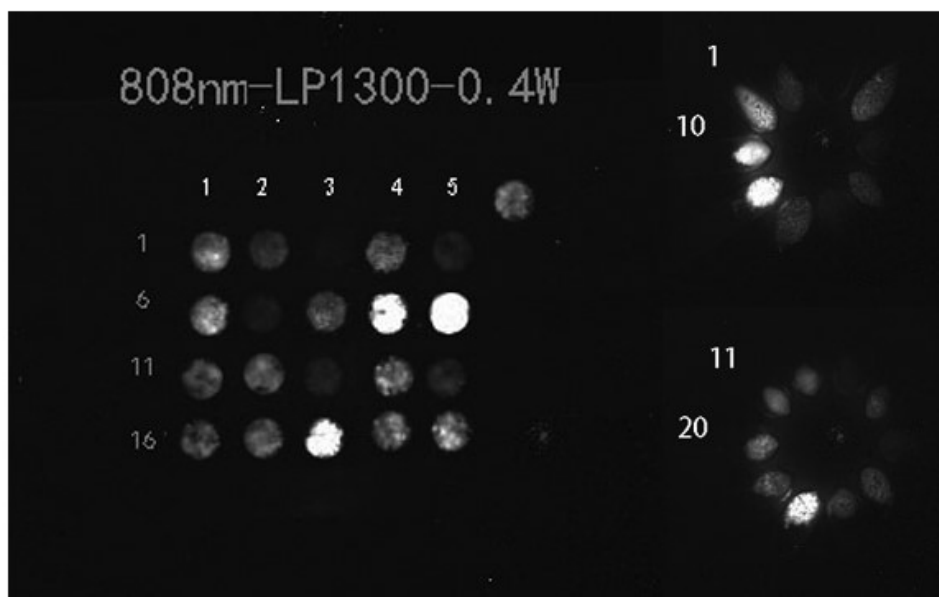

**Fig. S2.** The NIR II imaging of RENP in the second generation (808 nm, 0.4W, LP1300).

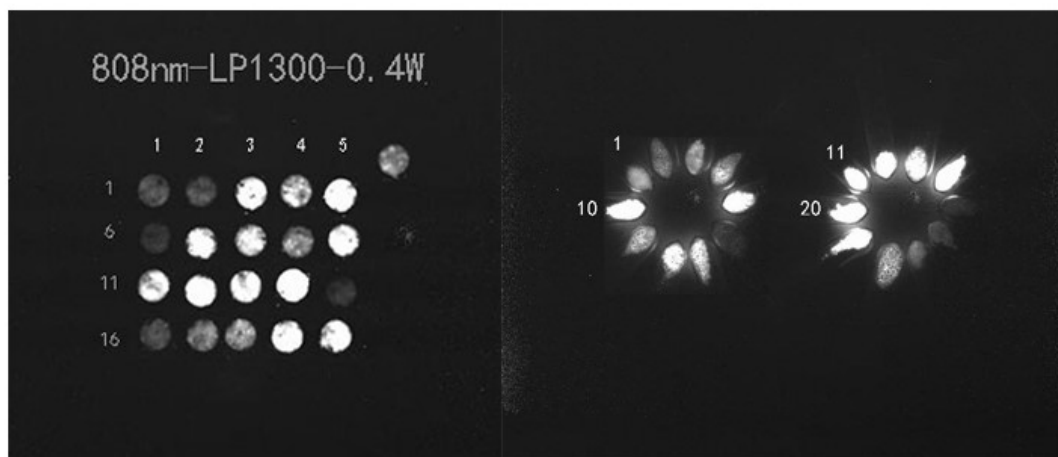

**Fig. S3.** The NIR II imaging of RENP in the third generation RENP (808 nm, 0.4W, LP1300).

| 1mmol | Gd     | Yb     | Er     | Ce     | Eu     |
|-------|--------|--------|--------|--------|--------|
| 1     | 0.8    | 0.123  | 0.0123 | 0.0615 | 0.0032 |
| 2     | 0.67   | 0.271  | 0.0271 | 0.0319 | 0      |
| 3     | 0.2075 | 0.6888 | 0.0454 | 0.0583 | 0      |
| 4     | 0.6101 | 0.339  | 0.017  | 0.0339 | 0      |
| 5     | 0.8648 | 0.1271 | 0.0026 | 0      | 0.0054 |
| 6     | 0.586  | 0.3598 | 0.0237 | 0.0304 | 0      |
| 7     | 0.5989 | 0.294  | 0.0289 | 0.0782 | 0      |
| 8     | 0.723  | 0.2572 | 0.0065 | 0.0133 | 0      |
| 9     | 0.8695 | 0.1278 | 0.0027 | 0      | 0      |
| 10    | 0.2872 | 0.6596 | 0.0194 | 0.0338 | 0      |
| 11    | 0.7534 | 0.1177 | 0.0118 | 0.0589 | 0.0582 |
| 12    | 0.7009 | 0.2346 | 0.0059 | 0.0586 | 0      |
| 13    | 0.8624 | 0.1348 | 0.0028 | 0      | 0      |
| 14    | 0.3558 | 0.6262 | 0.0179 | 0      | 0      |
| 15    | 0.8645 | 0.1146 | 0.0115 | 0.0095 | 0      |
| 16    | 0.8465 | 0.1244 | 0.0042 | 0.0249 | 0      |
| 17    | 0.3599 | 0.6335 | 0.0066 | 0      | 0      |
| 18    | 0.8439 | 0.1319 | 0.0088 | 0.0154 | 0      |
| 19    | 0.0996 | 0.783  | 0.0391 | 0.0783 | 0      |
| 20    | 0.6766 | 0.2971 | 0.0088 | 0.0176 | 0      |

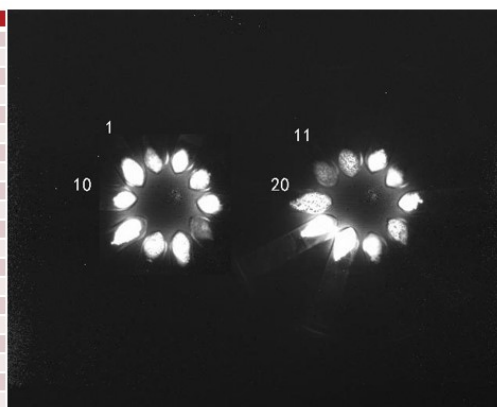

**Fig. S4.** The NIR II imaging of RENP in the fourth generation RENP (808nm, 0.4W, LP1300).

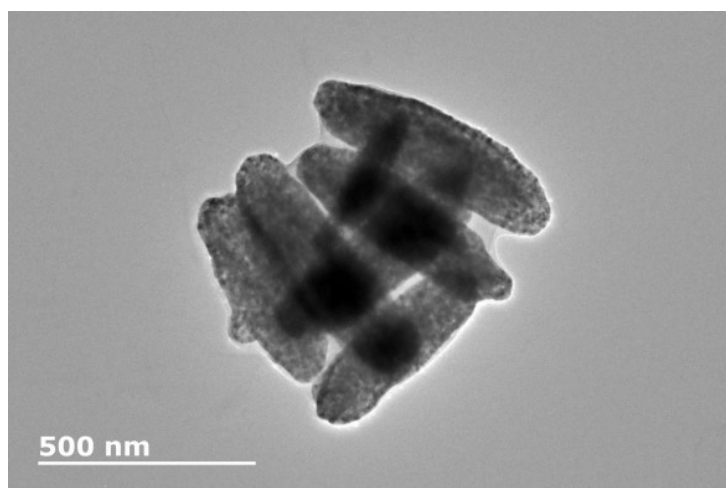

**Fig. S5.** TEM image of RENP-DHA-Cap.

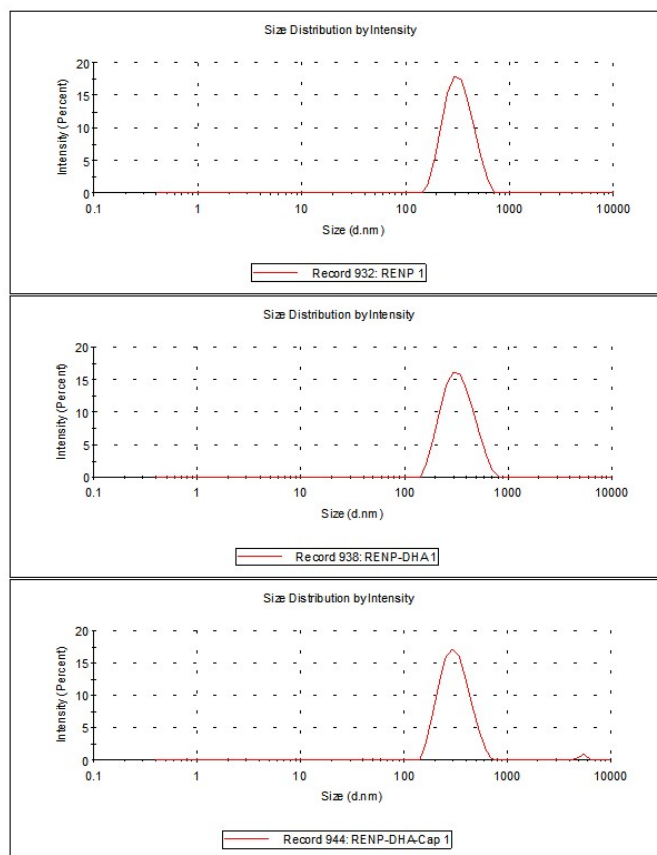

**Fig. S6.** DLS results of RENP, RENP-DHA, and RENP-DHA-Cap.

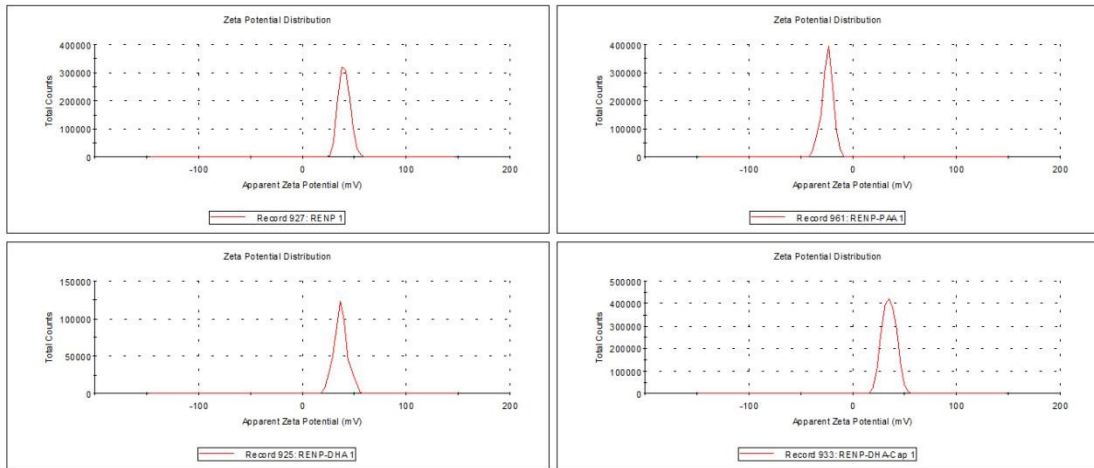

**Fig. S7.** Zeta potential results of RENP, RENP-DHA, and RENP-DHA-Cap.



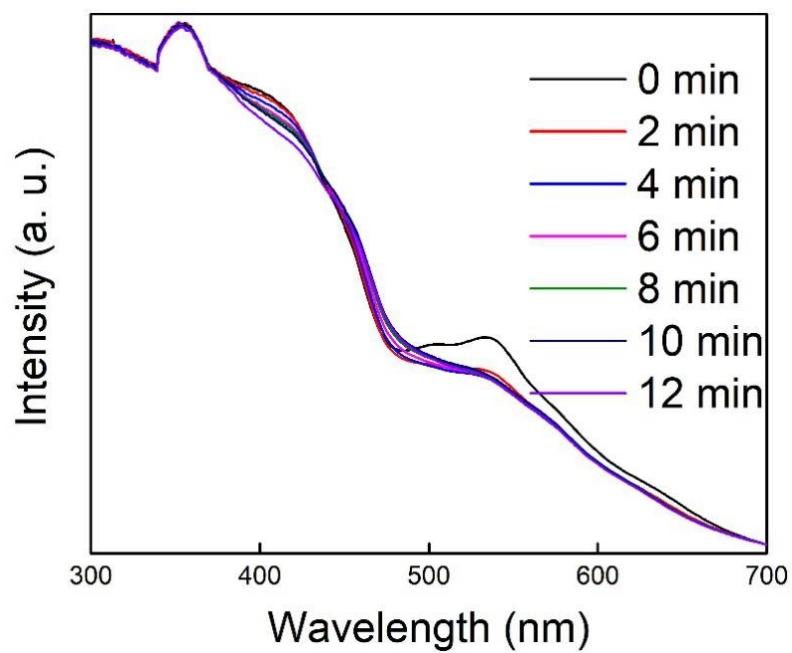

**Fig. S8.** UV-vis absorbance spectra of DPBF solution together with RENP-Anthocyanin under 980 nm laser with different irradiation time points.

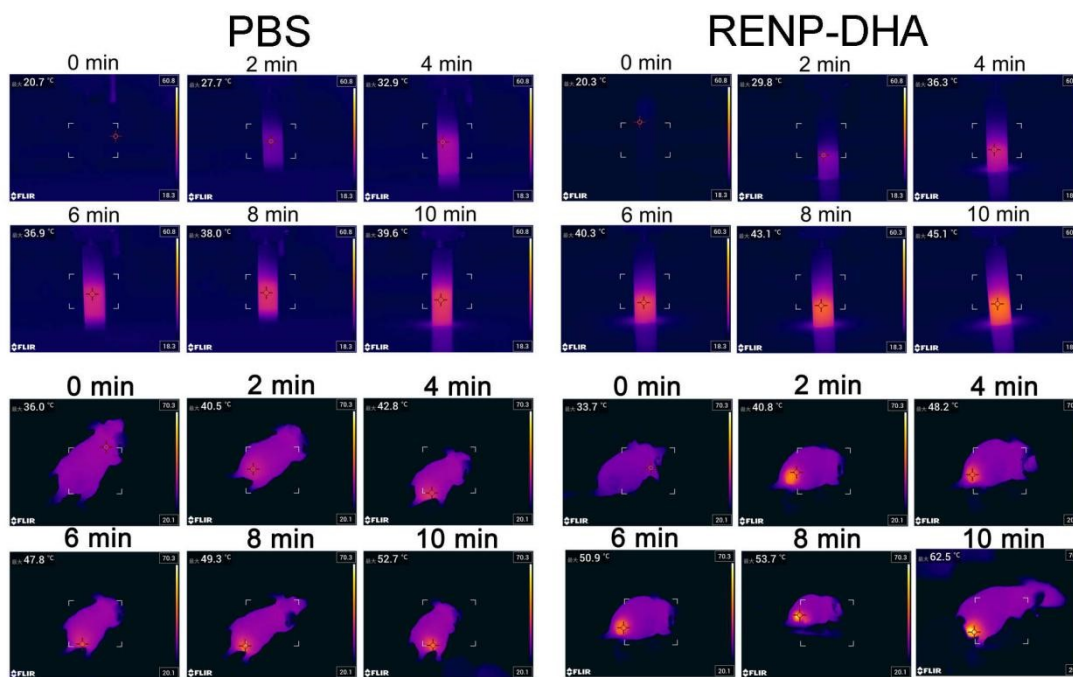

**Fig. S9.** Infrared thermal photographs of PBS and RENP-DHA at different time points with 980 nm excitation taken by infrared thermal imaging camera.

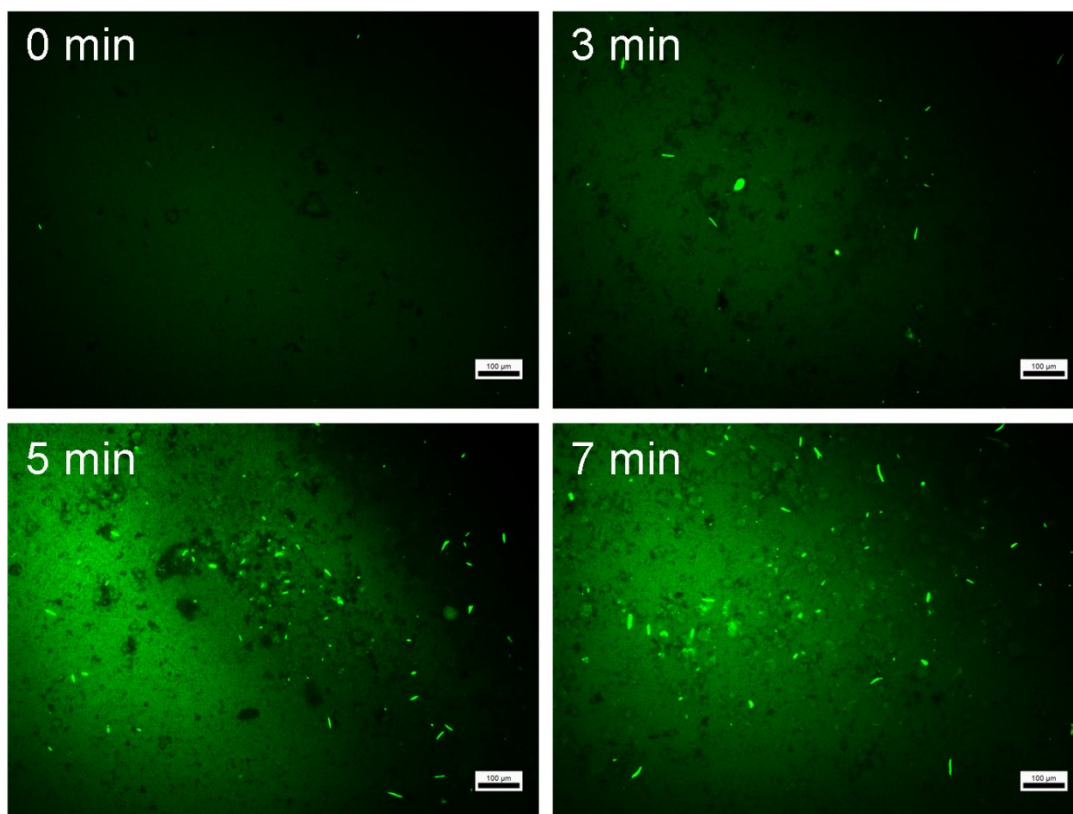

**Fig. S10.** Microscopy images of Cal 27 cells incubated with RENP-DHA-Cap under 980 nm laser with different irradiation time points. All the cells were finally marked with DCFH-DA.

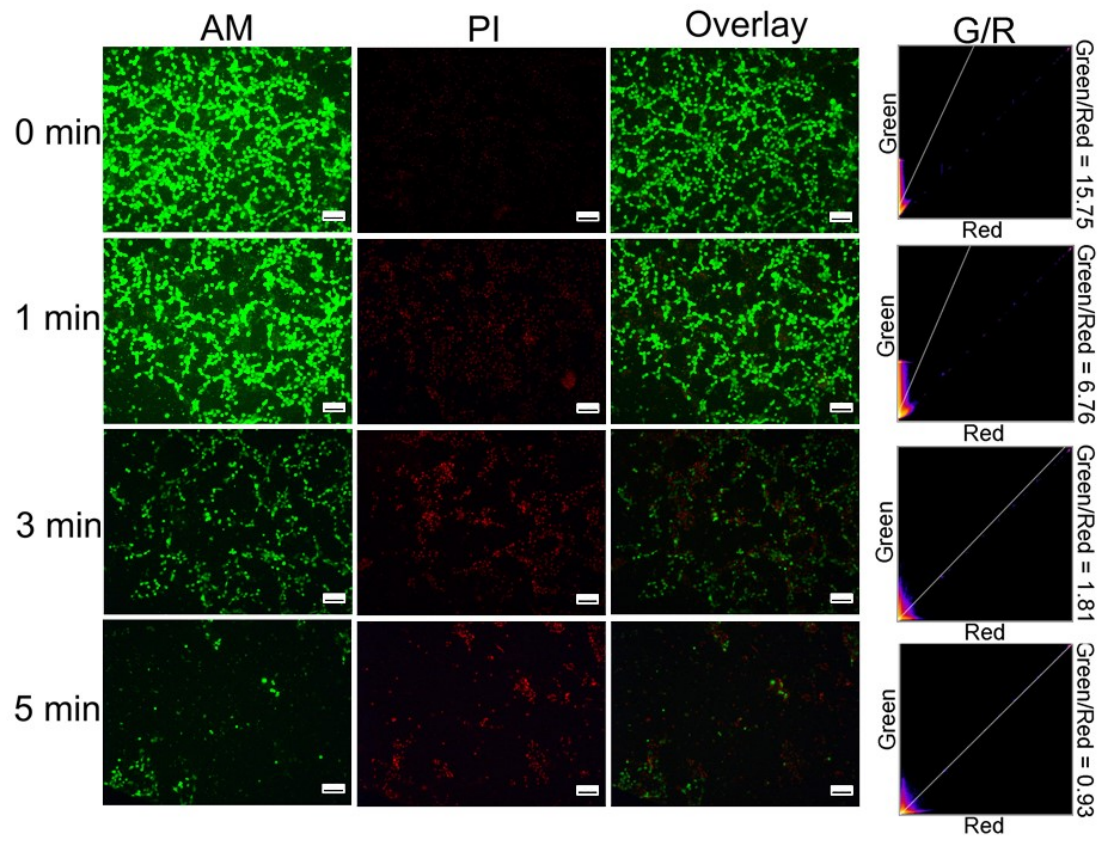

**Fig. S11.** Microscopy images of Cal27 cells co-incubated with RENP-DHA for 0, 1, 3, 5 min under 980 nm irradiation.

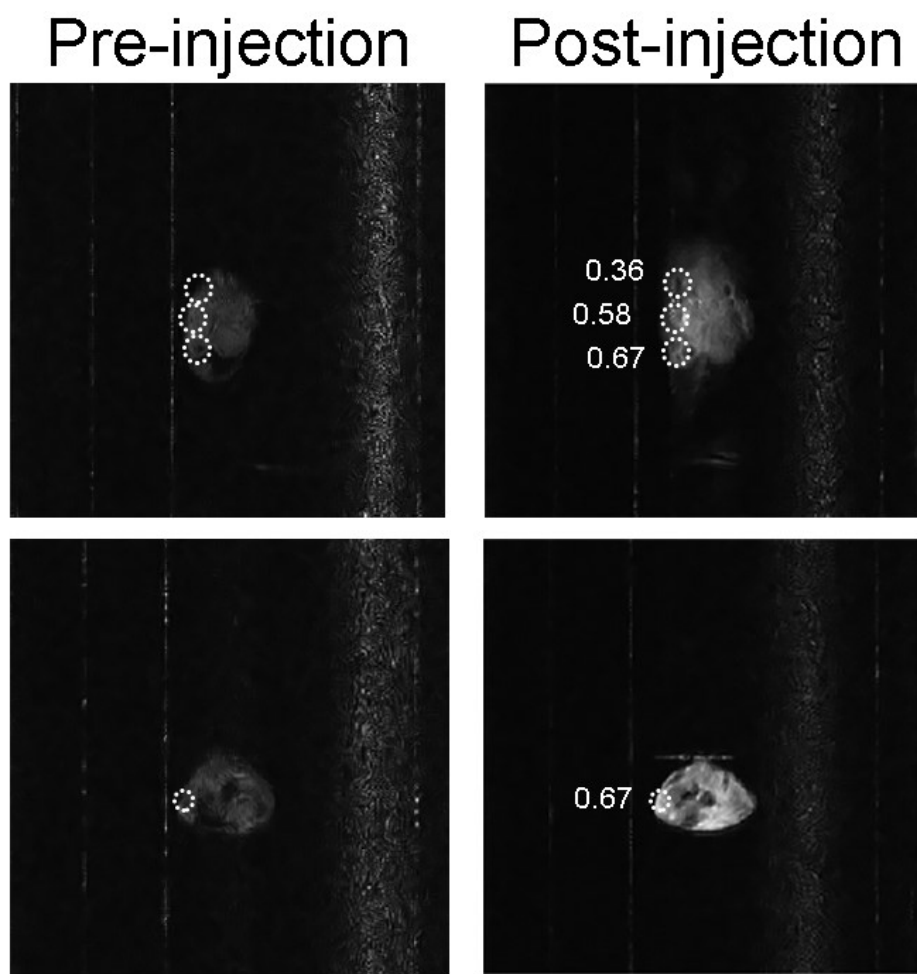

**Fig. S12.** T<sub>1</sub> signals of MRI in mice using three samples injected subcutaneously (Gd concentrations in RENP: 0.36-0.67; RENP concentration in PBS: 5 mg/mL).

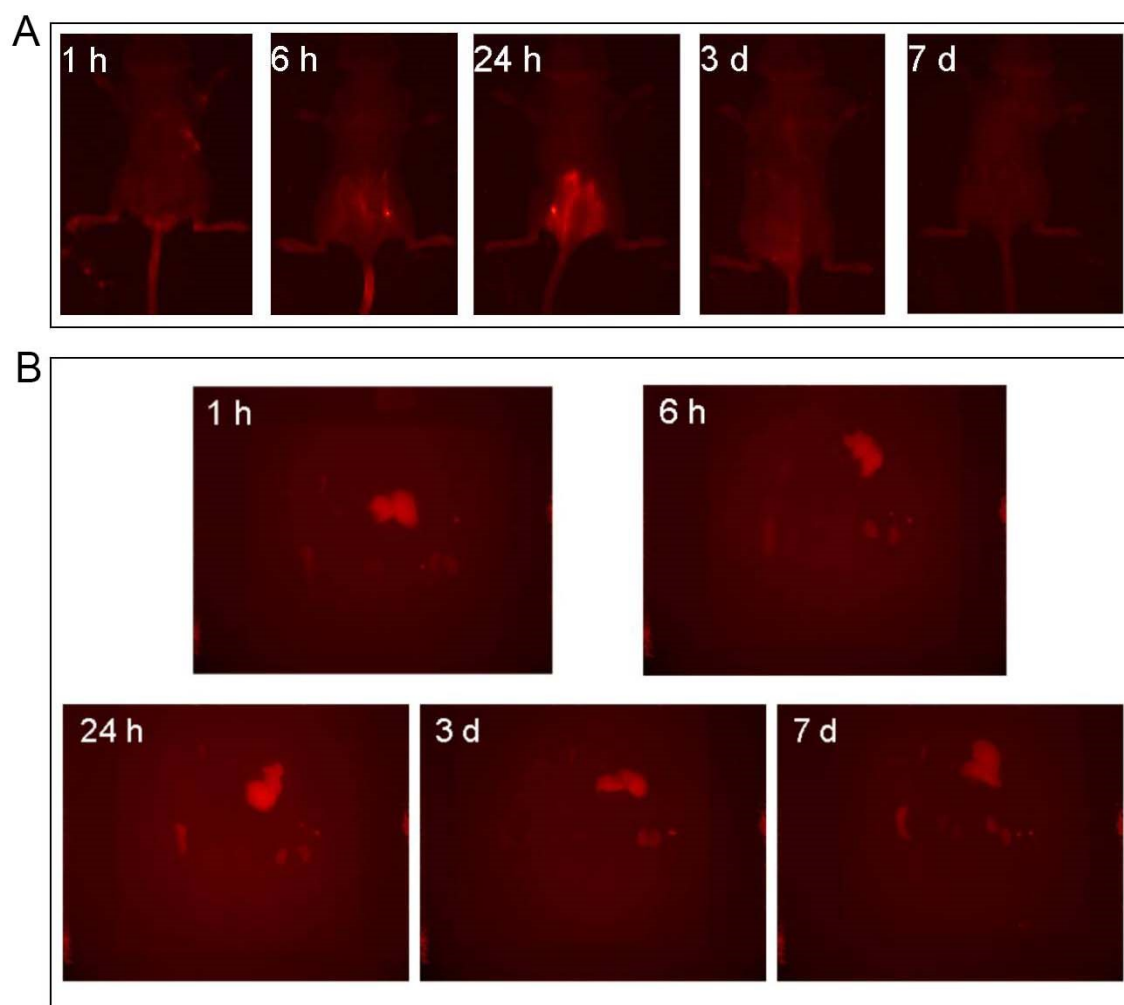

**Fig. S13.** The *in vivo* NIR II imaging of (A) mice and (B) dissected organs of heart, liver, spleen, lung, and kidney.

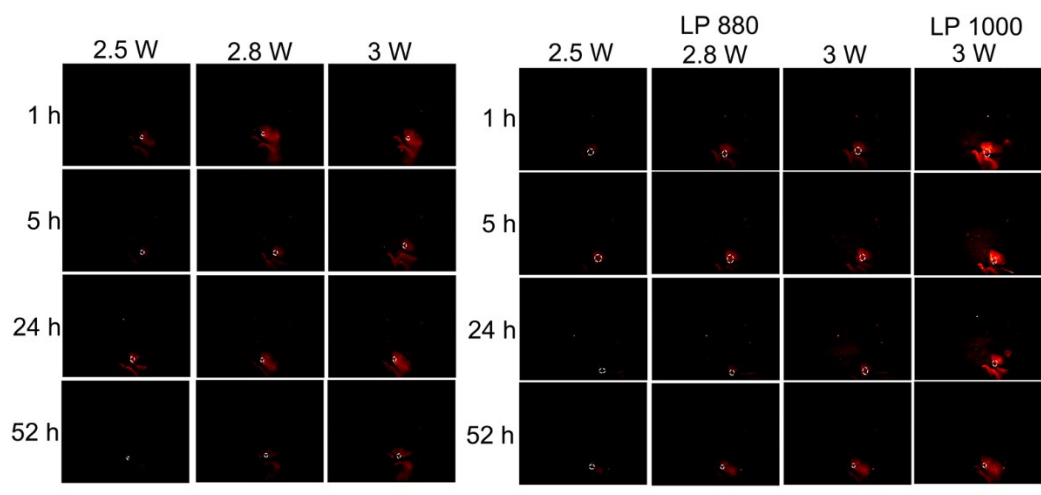

**Fig. S14.** The NIR II imaging of the mouse with *in situ* tumor after tail vein injection of RENP-DHA-Cap.
